# Supplementary material for: The Impact of Parental Death in Childhood on Sons’ and Daughters’ Status Attainment in Young Adulthood in the Netherlands, 1850–1952
Source: Springer Nature journal article supplement (doi:10.1007/s13524-019-00808-z), 2019-08-16
Supplement: MOESM1 [file 17083858]

**ONLINE APPENDIX**

**Table A1:** Father's mean HISCAM scores at birth to compare the sample population with those without occupational information

|                                | <b>Study sample</b> | <b>No occupation<br/>between the ages of<br/>23 and 33</b> | <b>No occupation at all</b> |
|--------------------------------|---------------------|------------------------------------------------------------|-----------------------------|
| <b>Male research persons</b>   |                     |                                                            |                             |
| Father's HISCAM at birth       | 52.46               | 52.80<br>(0.091)                                           | 54.97<br>(0.000)            |
| Total numbers                  | 8,187               | 1,946                                                      | 1,857                       |
| <b>Female research persons</b> |                     |                                                            |                             |
| Father's HISCAM at birth       | 52.21               | 52.48<br>(0.210)                                           | 54.87<br>(0.000)            |
| Total numbers                  | 6,915               | 1,442                                                      | 3,698                       |

**Table A2:** OLS regression with robust standard errors with continuous HISCAM score as dependent variable and parental death as dummy variable, male research persons, robustness checks<sup>a</sup>

|                             | (1) <sup>b</sup>    |       | (2) <sup>c</sup>     |       | (3) <sup>d</sup>    |       |
|-----------------------------|---------------------|-------|----------------------|-------|---------------------|-------|
|                             | Childhood variables |       | Orphanhood variables |       | Adulthood variables |       |
|                             | Coefficient         | SE    | Coefficient          | SE    | Coefficient         | SE    |
| <b>(I) Farmers excluded</b> |                     |       |                      |       |                     |       |
| <b>Orphanhood status</b>    |                     |       |                      |       |                     |       |
| Parental death              | -0.803**            | 0.294 | -1.336***            | 0.379 | -1.120**            | 0.355 |
| No parental death           | ref                 | ref   | ref                  | ref   | ref                 | ref   |
| Observations                | 6,700               |       | 6,700                |       | 6,700               |       |
| R-squared                   | 0.235               |       | 0.236                |       | 0.259               |       |

**(II) Non-bereaved sons who were not living with both biological parents excluded**

|                          |          |       |          |       |          |       |
|--------------------------|----------|-------|----------|-------|----------|-------|
| <b>Orphanhood status</b> |          |       |          |       |          |       |
| Parental death           | -0.773** | 0.270 | -1.048** | 0.328 | -1.040** | 0.323 |
| No parental death        | ref      | ref   | ref      | ref   | ref      | ref   |
| Observations             | 6,103    |       | 6,103    |       | 6,103    |       |
| R-squared                | 0.209    |       | 0.210    |       | 0.241    |       |

**(III) Highest paternal HISCAM score assigned to research persons without any occupational record**

|                          |         |       |          |       |          |       |
|--------------------------|---------|-------|----------|-------|----------|-------|
| <b>Orphanhood status</b> |         |       |          |       |          |       |
| Parental death           | -0.554* | 0.225 | -0.789** | 0.275 | -0.731** | 0.272 |
| No parental death        | ref     | ref   | ref      | ref   | ref      | ref   |
| Observations             | 10,044  |       | 10,044   |       | 10,044   |       |
| R-squared                | 0.313   |       | 0.313    |       | 0.334    |       |

† p<0.1, \* p<0.05, \*\* p<0.01, \*\*\* p<0.001

<sup>a</sup> Full tables are available upon request.

<sup>b</sup> Controlled for period of birth, mother's age at birth, father's literacy, number of younger and older brothers and sisters, number of sibling deaths, religious denomination, and paternal HISCAM score at birth.

<sup>c</sup> Controlled for period of birth, mother's age at birth, father's literacy, number of younger and older brothers and sisters, number of sibling deaths, religious denomination, paternal HISCAM score at birth, presence of step-parents, and presence of female kin.

<sup>d</sup> Controlled for period of birth, mother's age at birth, father's literacy, number of younger and older brothers and sisters, number of sibling deaths, religious denomination, paternal HISCAM score at birth, presence of step-parents, presence of female kin, civil status, provincial migration and place of residence, age at occupational record, and region of residence. Adulthood variables of male individuals without occupational entry are measured at age 27, the rounded sample average.

**Table A3:** OLS regression with robust standard errors with continuous HISCAM score as dependent variable and moderator variables, male research persons, farmers excluded<sup>a</sup>

|                                                 | (1)                    |       | (2)                |       | (3)                    |       |
|-------------------------------------------------|------------------------|-------|--------------------|-------|------------------------|-------|
|                                                 | Sex of deceased parent |       | Age at bereavement |       | Interactions with time |       |
|                                                 | Coefficient            | SE    | Coefficient        | SE    | Coefficient            | SE    |
| <b>Farmers excluded</b>                         |                        |       |                    |       |                        |       |
| <b>Orphanhood status</b>                        |                        |       |                    |       |                        |       |
| Full orphan                                     | -0.900                 | 0.988 |                    |       | -2.199                 | 3.197 |
| Paternal orphan                                 | -0.806†                | 0.461 |                    |       | -0.336                 | 0.980 |
| Maternal orphan                                 | -1.758***              | 0.501 |                    |       | -0.700                 | 0.849 |
| No parental death                               | ref                    | ref   |                    |       | ref                    | ref   |
| <b>Orphanhood status and age at bereavement</b> |                        |       |                    |       |                        |       |
| Paternal orphan, 0-2                            |                        |       | -1.459             | 0.919 |                        |       |
| Paternal orphan, 3-6                            |                        |       | -0.944             | 0.980 |                        |       |
| Paternal orphan, 7-10                           |                        |       | -0.659             | 0.641 |                        |       |
| Paternal orphan, 11-15                          |                        |       | -0.657             | 0.693 |                        |       |
| Maternal orphan, 0-2                            |                        |       | -2.630**           | 0.915 |                        |       |
| Maternal orphan, 3-6                            |                        |       | -1.768*            | 0.827 |                        |       |
| Maternal orphan, 7-10                           |                        |       | -2.406**           | 0.801 |                        |       |
| Maternal orphan, 11-15                          |                        |       | -1.106†            | 0.655 |                        |       |
| Full orphan                                     |                        |       | -0.970             | 0.989 |                        |       |
| No parental death                               |                        |       | ref                | ref   |                        |       |
| <b>Interaction with time</b>                    |                        |       |                    |       |                        |       |
| Full orphan X 1850-1879                         |                        |       |                    |       | 1.930                  | 3.406 |
| Full orphan X 1880-1899                         |                        |       |                    |       | 0.638                  | 3.621 |
| Full orphan X 1900-1922                         |                        |       |                    |       | ref                    | ref   |
| Paternal orphan X 1850-1879                     |                        |       |                    |       | -1.267                 | 1.098 |
| Paternal orphan X 1880-1899                     |                        |       |                    |       | 0.011                  | 1.145 |
| Paternal orphan X 1900-1922                     |                        |       |                    |       | ref                    | ref   |
| Maternal orphan X 1850-1879                     |                        |       |                    |       | -1.388                 | 1.072 |
| Maternal orphan X 1880-1899                     |                        |       |                    |       | -1.486                 | 1.024 |
| Maternal orphan X 1900-1922                     |                        |       |                    |       | ref                    | ref   |
| <b>Presence of step-parent</b>                  |                        |       |                    |       |                        |       |
| Step-father                                     | 0.0417                 | 0.762 | 0.201              | 0.788 | 0.0735                 | 0.762 |
| Step-mother                                     | 1.975**                | 0.686 | 2.210**            | 0.693 | 2.044**                | 0.696 |
| No step-parent                                  | ref                    | ref   | ref                | ref   | ref                    | ref   |
| Observations                                    | 6,700                  |       | 6,700              |       | 6,700                  |       |
| R-squared                                       | 0.2595                 |       | 0.2598             |       | 0.2601                 |       |

† p<0.1, \* p<0.05, \*\* p<0.01, \*\*\* p<0.001

<sup>a</sup> Controlled for period of birth, mother's age at birth, father's literacy, number of younger and older brothers and sisters, number of sibling deaths, religious denomination, paternal HISCAM score at birth, presence of step-parents, presence of female kin, civil status, provincial migration and place of residence, age at occupational record, and region of residence. Full table is available upon request.

### Male research persons

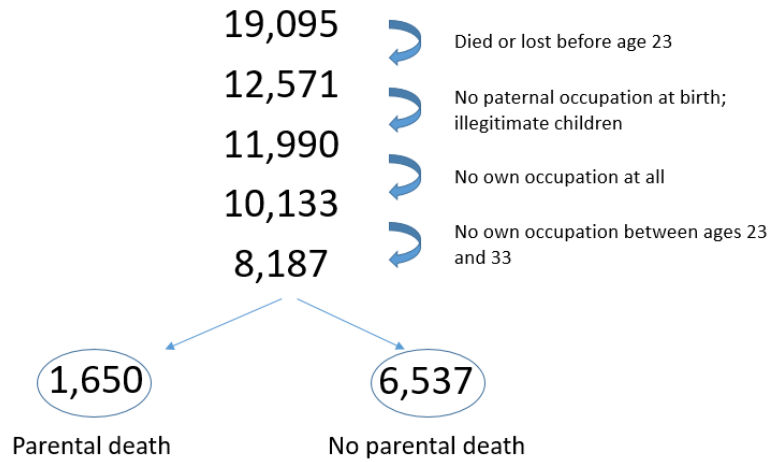

### Female research persons

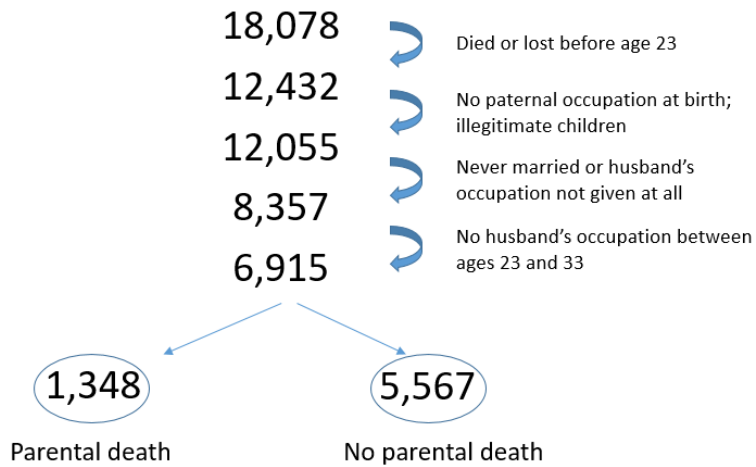

Fig. A1 Overview of sample selection process
